# Supplementary material
Source: PubMed Central journal article supplement (PMC3257388)
Supplement: NIHMS341875-supplement-1_si_001.pdf [file NIHMS341875-supplement-1_si_001.pdf]

# AirSR, a [2Fe-2S] Cluster-Containing Two-Component System, Mediates Global Oxygen Sensing and Redox Signaling in *Staphylococcus aureus*

Fei Sun<sup>1†</sup>, Quanjian Ji<sup>1†</sup>, Marcus B. Jones<sup>3</sup>, Xin Deng<sup>1</sup>, Haihua Liang<sup>1</sup>, Bryan  
Frank<sup>3</sup>, Joshua Telser<sup>4</sup>, Scott N. Peterson<sup>3</sup>, Taeok Bae<sup>\*2</sup>, Chuan He<sup>\*1</sup>

## Supporting Information

### EXPERIMENTAL METHODS

**Electrophoretic Mobility Shift Assays (EMSA).** DNA probes corresponding to the promoter region of three genes (*agr*, *sae*, and *cap5A*) were PCR-amplified from *S. aureus* chromosomal DNA using primers shown in Table S2. The various amount of AirR was incubated with 2 ng of 5'- $\gamma$ -<sup>32</sup>P-end labeled DNA probe in 25  $\mu$ l of the gel shift loading buffer (10 mM Tris-HCl, pH = 7.4, 50 mM KCl, 5 mM MgCl<sub>2</sub>, 10% Glycerol, and 3  $\mu$ g/ml sheared salmon sperm DNA). After being incubated at room temperature for 10 min, the samples were analyzed by 6% polyacrylamide gel electrophoresis (100V for pre-run, 85 V for 85 min for sample separation). The gels were dried and subjected to autoradiography on a phosphor screen (BAS-IP, Fuji).

## SUPPORTING FIGURE CAPTIONS

**Figure S1.** X-band EPR spectrum of AirS isolated from *E. coli* after dithionite reduction. Simulation of this signal gives  $g = [2.025, 1.917, 1.872]$ , which is identical to the 35 GHz Q-band result ( $g = [2.023, 1.915, 1.870]$ ) within experimental and simulation precision.

**Figure S2.** Quantitative analysis of the X-band EPR spectra at 17 K of the isolated AirS and the reconstituted AirS in comparison to the standard *Aae* Fd1. (A) Quantitative comparison of the X-band spectra shows that the isolated, dithionite reduced AirS (40  $\mu\text{M}$ ) contains approximately 15–25  $\mu\text{M}$  of  $[2\text{Fe-2S}]^+$  (38-62%), and that the reconstituted AirS (13  $\mu\text{M}$ ) contains 10–15  $\mu\text{M}$  of  $[2\text{Fe-2S}]^+$  (77-115%). (B) SDS-PAGE analysis shows the relative amounts of the isolated and the reconstituted AirS.

**Figure S3.** Effects of atmospheric  $\text{O}_2$  on the autokinase activity of the reconstituted AirS. The freshly reconstituted AirS was bubbled with air for 3 min or 1 h, followed by the addition of  $\gamma\text{-}^{32}\text{P-ATP}$ . The phosphorylation reactions were incubated inside anaerobic chamber at room temperature. At the indicated time points (2 min, and 5 min) aliquots of 10  $\mu\text{l}$  of the reaction mixture were taken and quenched with 10  $\mu\text{l}$  of 2 $\times$  SDS loading buffer. The samples were analyzed by SDS-PAGE followed by autoradiography.

**Figure S4.** The *airSR* loci in the  $\Delta\text{airS}$  mutant (A) and  $\Delta\text{airR}$  mutant (B). The *bursa aurealis* transposon insert is shown as a reversed triangle.

**Figure S5.** AirR binds to the promoter regions of *agr* (A), *sae* (B), and *cap5A* (C). In a typical assay, 2 ng of 5'- $\gamma\text{-}^{32}\text{P}$ -end labeled DNA probe was incubated with the indicated concentration of protein in the presence of 3  $\mu\text{g/ml}$  salmon sperm DNA at room temperature for 10 minutes. Free DNA was indicated by an arrow.

**Figure S6.** No growth defect was observed in Newman *airS* antisense strain (Newman/pYJ335-anti-*airS*) during anhydrotetracycline (ATc) induction. Overnight cultures of *S. aureus* were serially diluted (10-fold) and plated onto TSA-chloramphenicol plates with or without ATc (1  $\mu\text{g/ml}$ ) and incubated at 37°C for 36 h. The strain Newman carrying empty pYJ335 (Newman/pYJ335) was used as a control.

## SUPPORTING FIGURES

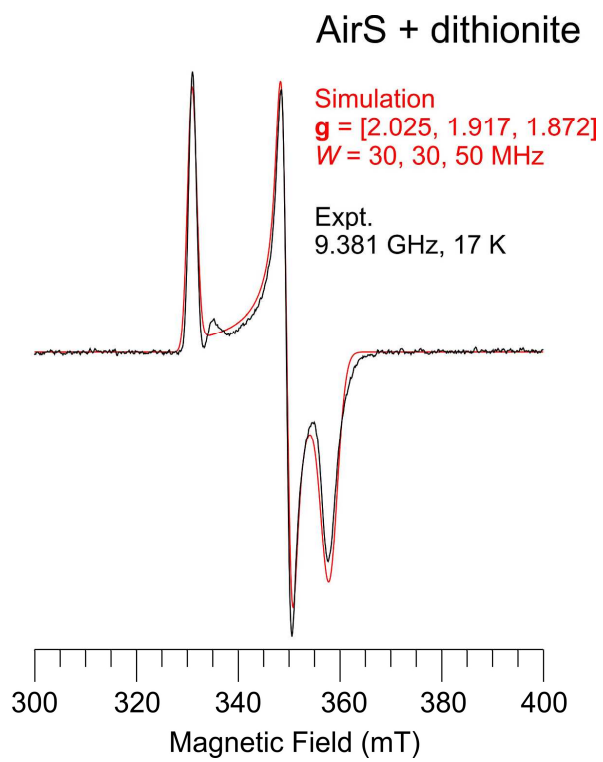

Figure S1. Sun et al

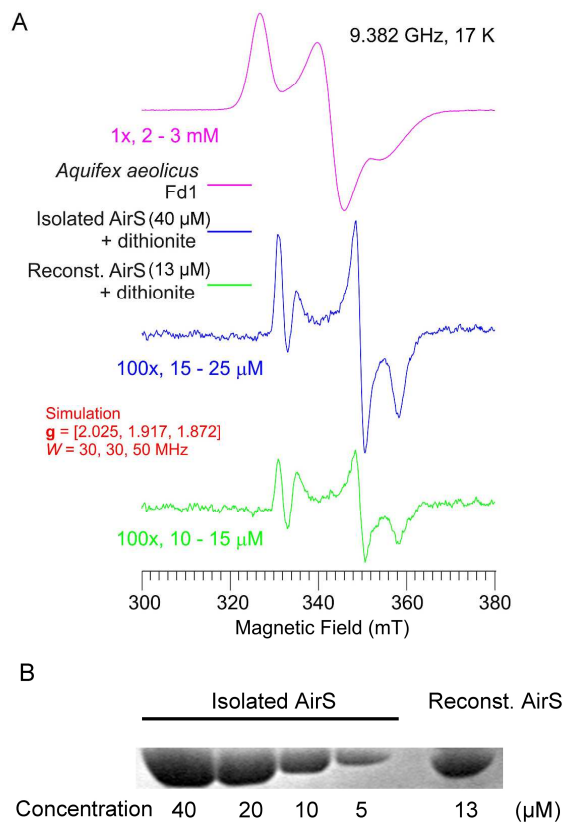

Figure S2. Sun et al

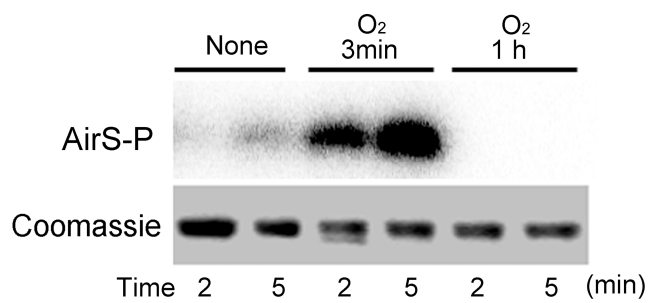

Figure S3. Sun et al

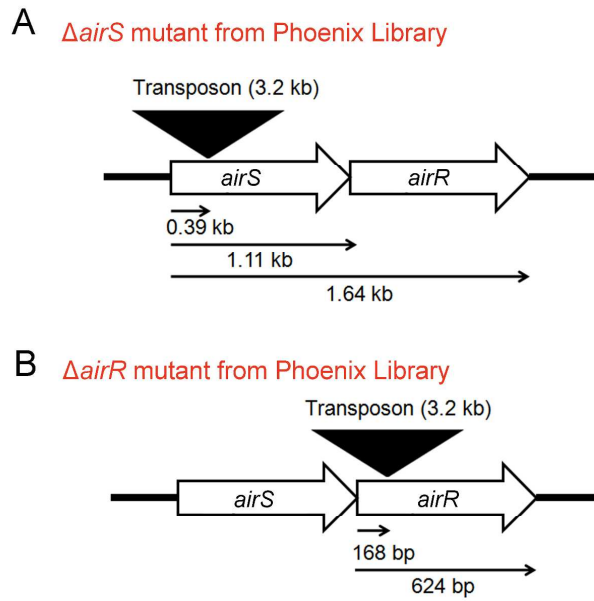

Figure S4. Sun et al

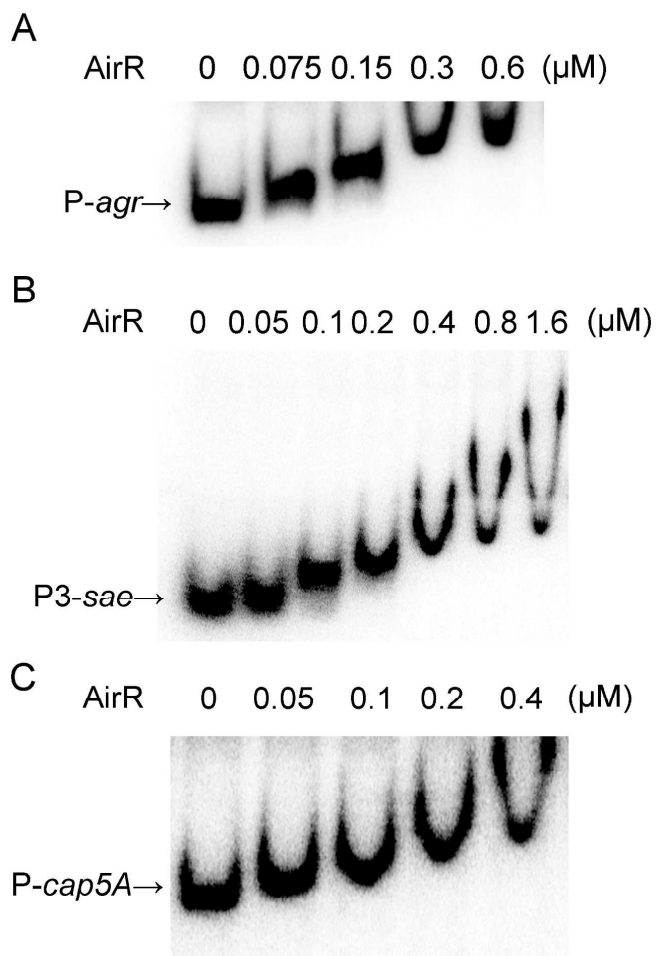

Figure S5. Sun et al

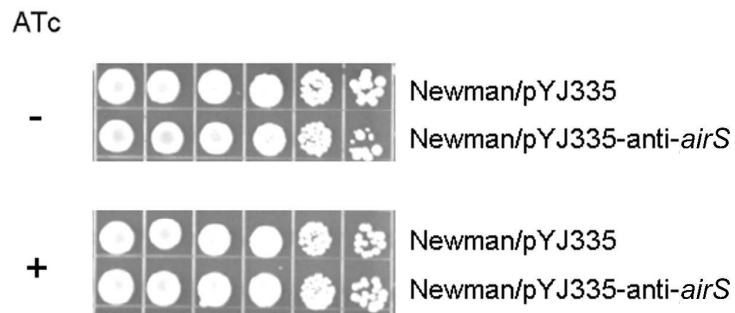

Figure S6. Sun et al

## SUPPORTING TABLES

**Table S1.** Bacterial strains and plasmids used in this study

| Strain/Plasmid              | Relevant Characteristics                                                                           | Source               |
|-----------------------------|----------------------------------------------------------------------------------------------------|----------------------|
| <i>E. coli</i>              |                                                                                                    |                      |
| DH5 $\alpha$                |                                                                                                    | Stratagene           |
| BL21 star(DE3)              |                                                                                                    | Invitrogen           |
| <i>S. aureus</i>            |                                                                                                    |                      |
| RN4220                      | restriction deficient, prophage-cured                                                              | 1                    |
| Newman                      | a clinical isolate                                                                                 | 2                    |
| Newman $\Delta$ <i>airR</i> | strain Newman with the <i>bursa aurealis</i> transposon insertion in <i>airR</i> , Em <sup>r</sup> | Phoenix library<br>3 |
| Newman $\Delta$ <i>airS</i> | strain Newman with the <i>bursa aurealis</i> transposon                                            | Phoenix library      |

|                          |                                                                                                 |            |
|--------------------------|-------------------------------------------------------------------------------------------------|------------|
|                          | insertion in <i>airS</i> , Em <sup>r</sup>                                                      | 3          |
| <b>Plasmids</b>          |                                                                                                 |            |
| pCL55                    | single-copy integration plasmid, Cmr                                                            | 4          |
| pCL55- <i>airSR</i>      | pCL55 carrying <i>airSR</i> operon                                                              | this study |
| pYJ335                   | Tet-inducible promoter; Ap <sup>r</sup> in <i>E. coli</i> ; Cm <sup>r</sup> in <i>S. aureus</i> | 5          |
| pYJ335-anti- <i>airS</i> | pYJ335 carrying antisense <i>airS</i> (353-bp)                                                  | 6          |
| pMCSG7                   | Ligation-independent-cloning (LIC) vector                                                       | 7          |

Em<sup>r</sup>: resistant to erythromycin; Cm<sup>r</sup>, resistant to chloramphenicol.

**Table S2.** Primers used in this study

| Primer                    | Sequence                                        | Application              |
|---------------------------|-------------------------------------------------|--------------------------|
| <i>capA</i> -F            | 5' TTTTATCTAAAGCAGACGGTACAGC 3'                 | qRT-PCR                  |
| <i>capA</i> -R            | 5' AAATCCACTTTTGATGAACGATATT 3'                 | qRT-PCR                  |
| <i>spa</i> -F             | 5'GGTACATTACTTATATCTGGTGGCG 3'                  | qRT-PCR                  |
| <i>spa</i> -R             | 5' TCAACATATCGACGTCATGATTACT 3'                 | qRT-PCR                  |
| <i>RNAIII</i> -F          | 5' ACAAGATATCATTTCAACAATCGGT3'                  | qRT-PCR                  |
| <i>RNAIII</i> -R          | 5' CTTTGATCCATAGCCACAATGTAAT3'                  | qRT-PCR                  |
| <i>hlgC</i> -F            | 5' TACAAAGTGGATTAAACCCTTCATT3'                  | qRT-PCR                  |
| <i>hlgC</i> -R            | 5' AGCGCAAGAGATAAGAAAATACCTA3'                  | qRT-PCR                  |
| <i>airSR</i> -BamHI<br>-F | 5'GTGTACAGGATCCCTTAAGTCATTAAGTTTTCTGGTAT<br>T3' | Complementa<br>tion test |

|                            |                                                          |                          |
|----------------------------|----------------------------------------------------------|--------------------------|
| <i>iscS</i> -F-LIC         | 5'TACTTCCAATCCAATGCCATGGAAATTTATGCAGATTATGCTG3'          | IscS cloning             |
| <i>iscS</i> -R-LIC         | 5'TTATCCACTTCCAATGTTATTATGACTCCTCCTTAAATTTAAAATAT3'      | IscS cloning             |
| <i>airR</i> -F-LIC         | 5'TACTTCCAATCCAATGCCATGAACAAAGTAATATTAGTAGATGAC3'        | AirR cloning             |
| <i>airR</i> -R-LIC         | 5'TTATCCACTTCCAATGTTACTAAATCAACTTATTTTCCATTGCATAAATTG3'  | AirR cloning             |
| <i>airS</i> -F-LIC         | 5'TACTTCCAATCCAATGCCATGGAACAAAGGACGCGACTAGCTTTATTA AAAAG | AirS cloning             |
| <i>airS</i> -R-LIC         | 5'TTATCCACTTCCAATGTTACTATTTTATAGGAATTGTGAATTGTATTTG3'    | AirS cloning             |
| <i>airSC79S/C8</i><br>1S-F | 5'CTATATTAAAGATGGGTCTTCTTGGTCTGTGAAAGCATT<br>TAATCAAC3'  | Mutagenesis              |
| <i>airSC79S/C8</i><br>1S-R | 5'GTTGATTAAATGCTTTCACAGACCAAGAAGACCCATCTTT<br>AATATAG3'  | Mutagenesis              |
| <i>Cap5A-F</i>             | 5'TCATCTAACTCACCTGAAATTACAAAA3'                          | EMSA                     |
| <i>Cap5A-R</i>             | 5'TTCCATTATTTACCTCCCTTAAAAA3'                            | EMSA                     |
| <i>agr-F</i>               | 5'CATTAAAACATGCTAAAAGCATTATTTTCC3'                       | EMSA                     |
| <i>agr-R</i>               | 5'CACCACTCTCCTCACTGTCATTATACGATTTAG3'                    | EMSA                     |
| <i>sae-P3-F</i>            | 5'GTCAGAATTCTTATTGTGGCAAAAGGTTTATAAA3'                   | EMSA                     |
| <i>sae-P3-R</i>            | 5'GTCATCTAGACAATTTGATAAGTTAAGTTTAAAA3'                   | EMSA                     |
| anti- <i>airS</i> -F       | 5' CTAGGAAATGCTTTAGAGG CTAAG 3'                          | Antisense<br><i>airS</i> |
| anti- <i>airS</i> -R       | 5' TGAATTGGAGCGATTTGATGGAAC 3'                           | Antisense                |



|  |  |             |
|--|--|-------------|
|  |  | <i>airS</i> |
|--|--|-------------|

**Table S3.** Genes differentially expressed in mid-exponential phase in *S. aureus airR* mutant compared to wild-type Newman.

| Gene name<br>(synonym)                   | Function/similarity                                                            | Transcriptome analysis                |
|------------------------------------------|--------------------------------------------------------------------------------|---------------------------------------|
|                                          |                                                                                | <i>ΔairR</i> /Newman expression ratio |
| <b>Virulence/Defence/Drug resistance</b> |                                                                                |                                       |
| NWMN_0095                                | <i>cap5A</i> capsular polysaccharide biosynthesis protein Cap5A                | 4.92                                  |
| NWMN_0096                                | <i>cap5B</i> capsular polysaccharide biosynthesis protein Cap5B                | 4.51                                  |
| NWMN_0097                                | <i>cap5C</i> capsular polysaccharide biosynthesis protein Cap5C                | 2.85                                  |
| NWMN_0098                                | <i>cap5D</i> capsular polysaccharide biosynthesis protein Cap5D                | 4.31                                  |
| NWMN_0099                                | <i>cap5E</i> capsular polysaccharide biosynthesis protein Cap5E                | 3.08                                  |
| NWMN_0101                                | <i>capF</i> capsular polysaccharide synthesis enzyme Cap5F                     | 2.77                                  |
| NWMN_0102                                | <i>cap5G</i> capsular polysaccharide biosynthesis protein Cap5G                | 3.24                                  |
| NWMN_0103                                | <i>capI</i> capsular polysaccharide synthesis enzyme Cap5I                     | 2.52                                  |
| NWMN_0104                                | <i>capJ</i> capsular polysaccharide synthesis enzyme Cap5J                     | 2.37                                  |
| NWMN_0105                                | <i>capK</i> capsular polysaccharide synthesis enzyme Cap5K                     | 2.10                                  |
| NWMN_0210                                | <i>lytM</i> peptidoglycan hydrolase                                            | 2.07                                  |
| NWMN_1084                                | antibacterial protein                                                          | 4.06                                  |
| NWMN_1085                                | antibacterial protein                                                          | 3.74                                  |
| NWMN_1664                                | arsenical resistance operon repressor homolog                                  | 2.19                                  |
| NWMN_1665                                | aesenical pump membrane protein homolog                                        | 2.01                                  |
| NWMN_2624                                | <i>rnalIII</i> delta-hemolysin precursor                                       | 3.57                                  |
| NWMN_0055                                | <i>spa</i> Immunoglobulin G binding protein A precursor                        | -2.20                                 |
| NWMN_0388                                | superantigen-like protein                                                      | -3.94                                 |
| NWMN_0389                                | <i>set7</i> superantigen-like protein                                          | -3.11                                 |
| NWMN_0391                                | superantigen-like protein                                                      | -2.13                                 |
| NWMN_0394                                | <i>set11</i> exotoxin 11                                                       | -9.13                                 |
| NWMN_0395                                | superantigen-like protein                                                      | -3.91                                 |
| NWMN_0396                                | <i>set13</i> exotoxin 13                                                       | -2.55                                 |
| NWMN_0397                                | <i>set14</i> exotoxin 14                                                       | -2.59                                 |
| NWMN_0524                                | <i>sdrD</i> Ser-Asp rich fibrinogen-binding, bone sialoprotein-binding protein | -2.59                                 |
| NWMN_0758                                | <i>ssp</i> extracellular ECM and plasma binding protein                        | -2.55                                 |
| NWMN_1069                                | <i>fib</i> fibrinogen-binding protein precursor                                | -2.16                                 |
| NWMN_1826                                | <i>map</i> map protein                                                         | -2.54                                 |
| NWMN_2318                                | <i>hlgA</i> gamma-hemolysin chain II precursor                                 | -2.16                                 |
| NWMN_2319                                | <i>hlgC</i> gamma-hemolysin component C                                        | -2.97                                 |
| NWMN_2320                                | <i>hlgB</i> gamma-hemolysin component C precursor                              | -2.15                                 |
| NWMN_2529                                | fibrinogen and keratin-10 binding surface anchored                             | -2.28                                 |

|                                   |             |                                                             |       |
|-----------------------------------|-------------|-------------------------------------------------------------|-------|
|                                   |             | protein                                                     |       |
| NWMN_2537                         | <i>isaB</i> | immunodominant antigen B                                    | -2.20 |
| NWMN_2439                         | <i>cidB</i> | Holin-like protein cidB                                     | -2.55 |
| <b>Transcriptional regulation</b> |             |                                                             |       |
| NWMN_1946                         | <i>agrA</i> | accessory gene regulator protein A                          | 1.96  |
| <b>Translation</b>                |             |                                                             |       |
| NWMN_0509                         | <i>fusA</i> | translation elongation factor G                             | -2.39 |
| NWMN_2137                         | <i>rplF</i> | 50S ribosomal protein L6                                    | -2.18 |
| <b>Transporter</b>                |             |                                                             |       |
| NWMN_2059                         | <i>mltA</i> | PTS system, mannitol specific IIA component                 | 2.15  |
| NWMN_0118                         |             | ABC transporter, permease protein                           | -2.21 |
| NWMN_1347                         |             | amino acid permease                                         | -2.39 |
| <b>Metabolism</b>                 |             |                                                             |       |
| NWMN_1209                         | <i>glpD</i> | glycerol-3-phosphate dehydrogenase                          | 3.30  |
| NWMN_0933                         | <i>purE</i> | phosphoribosylaminoimidazole carboxylase, catalytic subunit | 2.02  |
| NWMN_1216                         | <i>glnR</i> | glutamine synthetase repressor                              | 2.09  |
| NWMN_1217                         | <i>glnA</i> | glutamine-ammonia ligase                                    | 2.01  |
| NWMN_1348                         |             | threonine dehydratase                                       | -2.26 |
| NWMN_1349                         | <i>ald</i>  | alanine dehydrogenase                                       | -2.21 |
| NWMN_2111                         |             | alpha-acetolactate synthase                                 | -4.88 |
| <b>Cell wall/surface protein</b>  |             |                                                             |       |
| NWMN_2545                         |             | putative surface anchored protein                           | 2.03  |
| NWMN_2392                         |             | cell wall surface anchor family protein                     | -2.27 |
| <b>Unknown function</b>           |             |                                                             |       |
| NWMN_0233                         |             | hypothetical protein                                        | 2.17  |
| NWMN_0408                         | <i>lpl5</i> | hypothetical protein                                        | 2.30  |
| NWMN_0767                         |             | hypothetical protein                                        | 1.93  |
| NWMN_0904                         |             | hypothetical protein                                        | 1.99  |
| NWMN_0995                         |             | prophage L54a, antirepressor, putative                      | 2.16  |
| NWMN_1039                         |             | amidase                                                     | 1.87  |
| NWMN_1249                         |             | hypothetical protein                                        | 2.21  |
| NWMN_1894                         |             | hypothetical protein                                        | 2.29  |
| NWMN_1913                         |             | hypothetical protein                                        | 2.03  |
| NWMN_1999                         |             | similar to SceD precursor                                   | 5.16  |
| NWMN_2109                         |             | hypothetical protein                                        | 3.11  |
| NWMN_0116                         |             | hypothetical protein                                        | -2.33 |
| NWMN_0117                         |             | hypothetical protein                                        | -2.99 |

|           |                      |       |
|-----------|----------------------|-------|
| NWMN_0119 | hypothetical protein | -2.14 |
| NWMN_0362 | hypothetical protein | -2.23 |
| NWMN_0759 | hypothetical protein | -2.62 |
| NWMN_2110 | hypothetical protein | -3.54 |
| NWMN_2440 | hypothetical protein | -3.12 |

**Table S4.** Genes differentially expressed in stationary phase in *S. aureus airR* mutant compared to wild-type Newman.

| Gene name<br>(synonym)                   | Function/similarity                                                                | Transcriptome<br>analysis                 |
|------------------------------------------|------------------------------------------------------------------------------------|-------------------------------------------|
|                                          |                                                                                    | $\Delta airR$ /Newman<br>expression ratio |
| <b>Virulence/Defence/Drug resistance</b> |                                                                                    |                                           |
| NWMN_0095                                | <i>cap5A</i> capsular polysaccharide biosynthesis protein Cap5A                    | 45.71                                     |
| NWMN_0096                                | <i>cap5B</i> capsular polysaccharide biosynthesis protein Cap5B                    | 11.92                                     |
| NWMN_0097                                | <i>cap5C</i> capsular polysaccharide biosynthesis protein Cap5C                    | 18.02                                     |
| NWMN_0098                                | <i>cap5D</i> capsular polysaccharide biosynthesis protein Cap5D                    | 8.06                                      |
| NWMN_0099                                | <i>cap5E</i> capsular polysaccharide biosynthesis protein Cap5E                    | 4.51                                      |
| NWMN_0101                                | <i>capF</i> capsular polysaccharide synthesis enzyme Cap5F                         | 5.73                                      |
| NWMN_0102                                | <i>capH</i> capsular polysaccharide synthesis enzyme O-acetyl<br>transferase Cap5H | 12.99                                     |
| NWMN_0103                                | <i>capI</i> capsular polysaccharide synthesis enzyme Cap5I                         | 6.39                                      |
| NWMN_0104                                | <i>capJ</i> capsular polysaccharide synthesis enzyme Cap5J                         | 36.27                                     |
| NWMN_0105                                | <i>capK</i> capsular polysaccharide synthesis enzyme Cap5K                         | 7.19                                      |
| NWMN_0106                                | <i>capL</i> capsular polysaccharide synthesis enzyme Cap5L                         | 3.01                                      |
| NWMN_0107                                | <i>cap5</i> capsular polysaccharide biosynthesis protein Cap5M<br><i>M</i>         | 6.46                                      |
| NWMN_0108                                | <i>capN</i> capsular polysaccharide synthesis enzyme Cap5N                         | 2.45                                      |
| NWMN_0109                                | <i>capO</i> capsular polysaccharide synthesis enzyme Cap8O                         | 4.13                                      |
| NWMN_0110                                | capsular polysaccharide synthesis enzyme                                           | 3.72                                      |
| NWMN_0196                                | murein hydrolase regulator LrgA                                                    | 1.93                                      |
| NWMN_0197                                | <i>lrgB</i> antiholin-like protein LrgB                                            | 1.94                                      |
| NWMN_0461                                | regulatory protein SpoVG                                                           | 4.64                                      |
| NWMN_0756                                | <i>clfA</i> fibrinogen-binding protein A, clumping factor                          | 2.34                                      |
| NWMN_0761                                | cold shock protein                                                                 | 2.32                                      |
| NWMN_0791                                | hemolysin                                                                          | 1.94                                      |
| NWMN_1091                                | <i>pbpA</i> penicillin-binding protein 1                                           | 2.32                                      |
| NWMN_1084                                | antibacterial protein                                                              | 3.98                                      |
| NWMN_1085                                | antibacterial protein                                                              | 4.94                                      |
| NWMN_1184                                | similar to metallo-beta-lactamase family protein                                   | 2.21                                      |
| NWMN_1709                                | <i>epiG</i> lantibiotic epidermin immunity protein G                               | 1.85                                      |
| NWMN_1710                                | <i>epiE</i> lantibiotic epidermin immunity protein F                               | 2.23                                      |

|                                       |              |                                                   |       |
|---------------------------------------|--------------|---------------------------------------------------|-------|
| NWMN_1718                             | <i>lukD</i>  | leukotoxin LukD                                   | 2.19  |
| NWMN_1826                             | <i>map</i>   | map protein                                       | 3.01  |
| NWMN_1873                             | <i>hlyB</i>  | beta hemolysin precursor                          | 2.05  |
| NWMN_2086                             | <i>asp23</i> | alkaline shock protein 23                         | 4.68  |
| NWMN_2624                             |              | delta-hemolysin precursor                         | 3.39  |
| NWMN_0050                             |              | putative myosin-crossreactive antigen             | -4.17 |
| NWMN_0055                             | <i>spa</i>   | Immunoglobulin G binding protein A precursor      | -3.96 |
| NWMN_0166                             | <i>coa</i>   | staphylocoagulase precursor                       | -3.78 |
| NWMN_0345                             | <i>ltrA</i>  | low temperature requirement protein LtrA          | -2.10 |
| NWMN_0388                             |              | superantigen-like protein                         | -3.69 |
| NWMN_0394                             | <i>set11</i> | exotoxin 11                                       | -3.10 |
| NWMN_0400                             |              | superantigen-like protein                         | -5.68 |
| NWMN_0757                             |              | putative staphylocoagulase                        | -3.72 |
| NWMN_0844                             | <i>clpB</i>  | ClpB chaperone homolog                            | -2.48 |
| NWMN_1876                             |              | staphylococcal complement inhibitor SCIN          | -2.12 |
| NWMN_1877                             |              | chemotaxis-inhibiting protein CHIPS               | -2.50 |
| NWMN_1604                             |              | universal stress protein family                   | -2.80 |
| NWMN_2199                             | <i>ssaA</i>  | secretory antigen precursor SsaA homolog          | -2.05 |
| NWMN_2317                             | <i>sbi</i>   | IgG-binding protein SBI                           | -2.40 |
| NWMN_2319                             | <i>hlyC</i>  | gamma-hemolysin component C precursor             | -2.08 |
| NWMN_2398                             | <i>fnb</i>   | fibronectin-binding protein homolog               | -3.97 |
| NWMN_2399                             | <i>fnbA</i>  | fibronectin binding protein A                     | -3.99 |
| NWMN_2461                             | <i>crtN</i>  | squalene synthase                                 | -3.15 |
| <b><i>Stress-associated genes</i></b> |              |                                                   |       |
| NWMN_0771                             |              | OsmC/Ohr family protein                           | 2.01  |
| NWMN_0779                             |              | putative thioredoxin                              | 3.42  |
| NWMN_0321                             |              | putative oxidoreductase                           | 5.05  |
| NWMN_0930                             |              | quinol oxidase polypeptide II QoxA                | 2.01  |
| NWMN_0980                             | <i>ctaA</i>  | cytochrome oxidase assembly protein               | 2.09  |
| NWMN_1060                             | <i>sdhC</i>  | succinate dehydrogenase, cytochrome b-558 subunit | 3.47  |
| NWMN_1061                             | <i>sdhA</i>  | succinate dehydrogenase                           | 2.27  |
| NWMN_1062                             | <i>sdhB</i>  | succinate dehydrogenase iron-sulfur subunit       | 1.84  |
| NWMN_1326                             | <i>odhA</i>  | oxoglutarate dehydrogenase                        | 2.00  |
| NWMN_1326                             | <i>odhA</i>  | 2-oxoglutarate dehydrogenase E1                   | 2.71  |
| NWMN_1412                             |              | glucose-6-phosphate 1-dehydrogenase               | 1.88  |
| NWMN_1603                             | <i>ald</i>   | alanine dehydrogenase                             | 1.95  |
| NWMN_1659                             | <i>ribH</i>  | riboflavin synthase, beta subunit                 | 3.39  |
| NWMN_1660                             | <i>ribA</i>  | riboflavin biosynthesis protein                   | 2.74  |
| NWMN_1748                             |              | similar to iron-sulfur cluster-binding protein    | 2.06  |
| NWMN_2026                             |              | aldehyde dehydrogenase family protein             | 4.54  |
| NWMN_2060                             | <i>mitD</i>  | mannitol-1-phosphate 5-dehydrogenase              | 2.41  |
| NWMN_2369                             |              | glucose 1-dehydrogenase-like protein              | 3.18  |
| NWMN_2454                             | <i>rocA</i>  | 1-pyrroline-5-carboxylate dehydrogenase           | 1.89  |

|           |             |                                                       |       |
|-----------|-------------|-------------------------------------------------------|-------|
| NWMN_2464 |             | similar to phytoene dehydrogenase                     | 4.34  |
| NWMN_2515 |             | anaerobic ribonucleoside triphosphate reductase       | 2.06  |
| NWMN_2605 |             | cold shock protein                                    | 2.56  |
| NWMN_0071 |             | acetoin reductase                                     | -2.28 |
| NWMN_0077 | <i>sodM</i> | superoxide dismutase                                  | -2.19 |
| NWMN_0156 |             | similar to NADH-dependent dehydrogenase               | -3.42 |
| NWMN_0175 |             | flavoheмоprotein                                      | -1.79 |
| NWMN_0332 |             | similar to NADH-dependent FMN reductase               | -2.00 |
| NWMN_0371 | <i>ahpF</i> | alkyl hydroperoxide reductase subunit F               | -2.09 |
| NWMN_0372 | <i>ahpC</i> | Alkyl hydroperoxide reductase subunit C               | -1.95 |
| NWMN_0387 |             | similar to oxidoreductase                             | -2.18 |
| NWMN_0418 |             | NADH dehydrogenase subunit L                          | -2.16 |
| NWMN_1199 |             | 2-oxoglutarate ferredoxin oxidoreductase subunit beta | -2.73 |
| NWMN_1392 |             | ferredoxin                                            | -2.88 |
| NWMN_1456 |             | superoxide dismutase                                  | -2.19 |
| NWMN_2090 |             | putative zinc-binding dehydrogenase                   | -2.05 |
| NWMN_2274 |             | pyridine nucleotide-disulfide oxidoreductase          | -2.13 |
| NWMN_2299 | <i>nasE</i> | assimilatory nitrite reductase                        | -2.01 |
| NWMN_2300 | <i>nirB</i> | nitrite reductase [NAD(P)H], large subunit            | -2.12 |
| NWMN_2422 |             | 2-hydroxyacid dehydrogenase                           | -2.10 |
| NWMN_2488 | <i>pyrD</i> | dihydroorotate dehydrogenase 2                        | -2.05 |
| NWMN_2518 |             | sulfite reductase flavoprotein                        | -2.47 |

#### *Transcriptional regulation*

|           |              |                                                |       |
|-----------|--------------|------------------------------------------------|-------|
| NWMN_0459 | <i>purR</i>  | purine operon repressor                        | 2.70  |
| NWMN_0673 |              | similar to CsbB stress response protein        | 3.26  |
| NWMN_0674 | <i>saeS</i>  | sensor histidine kinase SaeS                   | 3.00  |
| NWMN_0675 | <i>saeR</i>  | DNA-binding response regulator SaeR            | 2.27  |
| NWMN_1327 | <i>arlS</i>  | sensor histidine kinase protein                | 2.09  |
| NWMN_1585 | <i>phoR</i>  | alkaline phosphatase synthesis sensor protein  | 2.02  |
| NWMN_1415 | <i>malR</i>  | maltose operon transcriptional repressor       | 1.85  |
| NWMN_1944 | <i>agrD</i>  | accessory gene regulator protein D             | 2.63  |
| NWMN_1971 |              | serine-protein kinase RsbW                     | 2.77  |
| NWMN_1973 | <i>rsbU</i>  | sigma-B regulation protein                     | 1.87  |
| NWMN_1974 |              | similar to pemK family of DNA-binding proteins | 2.23  |
| NWMN_2291 |              | putative response regulator                    | 2.12  |
| NWMN_0056 | <i>sarH1</i> | staphylococcal accessory regulator             | -2.09 |
| NWMN_0205 |              | putative ribose operon repressor               | -3.36 |
| NWMN_0667 |              | transcriptional regulator, DeoR family         | -3.99 |
| NWMN_0740 |              | glycolytic operon regulator                    | -2.45 |
| NWMN_2258 | <i>tcaR</i>  | transcriptional regulator TcaR                 | -2.10 |
| NWMN_2404 |              | transcriptional regulator, MerR family         | -1.92 |

#### *Translation*

|           |             |                                                  |       |
|-----------|-------------|--------------------------------------------------|-------|
| NWMN_0460 |             | translation initiation inhibitor homolog         | 3.48  |
| NWMN_0008 | <i>serS</i> | seryl-tRNA synthetase                            | 3.44  |
| NWMN_1180 |             | putative tRNA pseudouridine synthase B           | 2.77  |
| NWMN_1401 | <i>rluB</i> | ribosomal large subunit pseudouridine synthase B | 1.90  |
| NWMN_0023 | <i>orfX</i> | rRNA large subunit methyltransferase             | -2.62 |
| NWMN_0513 |             | chaperone protein HchA                           | -2.97 |
| NWMN_0501 | <i>rplJ</i> | 50S ribosomal protein L10                        | -2.09 |
| NWMN_0502 | <i>rplL</i> | 50S ribosomal protein L7/L12                     | -2.49 |
| NWMN_0721 | <i>yfiA</i> | ribosomal subunit interface protein              | -3.95 |
| NWMN_1166 | <i>rpsB</i> | 30S ribosomal protein S2                         | -1.81 |
| NWMN_2129 | <i>rpmJ</i> | 50S ribosomal protein L36                        | -2.13 |
| NWMN_2130 | <i>infA</i> | translation initiation factor IF-1               | -2.08 |
| NWMN_2134 | <i>rpmD</i> | 50S ribosomal protein L30                        | -2.10 |
| NWMN_2135 | <i>rpsE</i> | 30S ribosomal protein S5                         | -2.33 |
| NWMN_2136 | <i>rplR</i> | 50S ribosomal protein L18                        | -2.44 |
| NWMN_2140 | <i>rplE</i> | 50S ribosomal protein L5                         | -1.98 |
| NWMN_2141 | <i>rplX</i> | 50S ribosomal protein L24                        | -2.02 |
| NWMN_2142 | <i>rplN</i> | 50S ribosomal protein L14                        | -2.40 |
| NWMN_2143 | <i>rpsQ</i> | 30S ribosomal protein S17                        | -1.86 |
| NWMN_2146 | <i>rpsC</i> | 30S ribosomal protein S3                         | -2.86 |
| NWMN_2147 | <i>rplV</i> | 50S ribosomal protein L22                        | -2.44 |
| NWMN_2148 | <i>rpsS</i> | 30S ribosomal protein S19                        | -2.29 |
| NWMN_2150 |             | 50S ribosomal protein L23                        | -2.01 |
| NWMN_2153 | <i>rpsJ</i> | 30S ribosomal protein S10                        | -1.78 |

#### DNA Replication

|           |             |                         |      |
|-----------|-------------|-------------------------|------|
| NWMN_1015 |             | large terminase         | 1.95 |
| NWMN_1469 | <i>recO</i> | DNA repair protein RecO | 2.28 |

#### Cell wall/surface protein

|           |             |                                         |       |
|-----------|-------------|-----------------------------------------|-------|
| NWMN_0412 |             | staphylococcal tandem lipoprotein       | 2.48  |
| NWMN_0523 |             | putative surface anchored protein       | 2.09  |
| NWMN_0677 |             | putative lipoprotein                    | 3.36  |
| NWMN_0887 |             | similar to cell wall synthesis protein  | 2.06  |
| NWMN_1394 |             | putative lipoprotein                    | 2.03  |
| NWMN_2270 |             | putative lipoprotein                    | 2.81  |
| NWMN_0076 |             | polysaccharide extrusion protein        | -2.32 |
| NWMN_0078 |             | putative surface anchored protein       | -3.27 |
| NWMN_0401 |             | putative surface protein                | -4.15 |
| NWMN_2392 |             | cell wall surface anchor family protein | -2.22 |
| NWMN_2545 | <i>sasF</i> | putative surface anchored protein       | -2.92 |

#### Metabolism

|           |             |                         |      |
|-----------|-------------|-------------------------|------|
| NWMN_0007 | <i>hutH</i> | histidine ammonia-lyase | 3.46 |
|-----------|-------------|-------------------------|------|

|                  |             |                                                                                                    |       |
|------------------|-------------|----------------------------------------------------------------------------------------------------|-------|
| NWMN_0047        |             | similar to aminoacylase                                                                            | 2.70  |
| NWMN_1090        | <i>ftsL</i> | cell division protein                                                                              | 2.66  |
| NWMN_0738        |             | cell-division inhibitor                                                                            | 1.97  |
| NWMN_0949        | <i>ptsH</i> | phosphocarrier protein HPr                                                                         | 2.24  |
| NWMN_1162        | <i>xerC</i> | site-specific recombinase XerC homolog                                                             | 2.11  |
| NWMN_1163        | <i>clpQ</i> | ATP-dependent protease peptidase subunit                                                           | 2.06  |
| NWMN_2235        |             | arginase family protein                                                                            | 2.78  |
| NWMN_0129        |             | ornithine aminotransferase                                                                         | -1.92 |
| NWMN_0167        |             | acetyl-CoA acetyltransferase homolog                                                               | -2.13 |
| NWMN_0475        | <i>cysK</i> | cysteine synthase A                                                                                | -2.18 |
| NWMN_0486        |             | putative ATP:guanido phosphotransferase                                                            | -2.02 |
| NWMN_0668        | <i>fruB</i> | fructose 1-phosphate kinase                                                                        | -2.20 |
| NWMN_0742        | <i>pgk</i>  | phosphoglycerate kinase                                                                            | -2.81 |
| NWMN_0743        |             | triosephosphate isomerase                                                                          | -2.98 |
| NWMN_0744        |             | phosphoglyceromutase                                                                               | -2.30 |
| NWMN_0745        | <i>eno</i>  | phosphopyruvate hydratase                                                                          | -2.55 |
| NWMN_0916        | <i>sspC</i> | cysteine protease                                                                                  | -1.93 |
| NWMN_1541        | <i>tgt</i>  | queuine tRNA-ribosyltransferase                                                                    | -2.30 |
| NWMN_1587        |             | isocitrate dehydrogenase                                                                           | -2.96 |
| NWMN_1588        | <i>citZ</i> | citrate synthase                                                                                   | -1.99 |
| NWMN_1592        | <i>pyk</i>  | pyruvate kinase                                                                                    | -2.12 |
| NWMN_1348        | <i>ilvA</i> | threonine dehydratase                                                                              | -2.13 |
| NWMN_2031        | <i>pyrG</i> | CTP synthetase                                                                                     | -1.78 |
| NWMN_2131        | <i>adk</i>  | adenylate kinase                                                                                   | -2.14 |
| NWMN_2205        |             | glycerate dehydrogenase                                                                            | -1.92 |
| NWMN_2229        |             | dehydrogenase                                                                                      | -1.82 |
| NWMN_2232        | <i>hutU</i> | urocanate hydratase                                                                                | -2.54 |
| NWMN_2315        |             | putative phosphoglycerate mutase                                                                   | -2.21 |
| NWMN_2416        |             | phospholipase/carboxylesterase family protein                                                      | -3.61 |
| NWMN_2437        | <i>ptsG</i> | phosphotransferase system, glucose-specific IIBC component                                         | -2.37 |
| NWMN_2448        | <i>clpL</i> | putative ATP-dependent protease ATP-binding subunit ClpL                                           | -2.69 |
| NWMN_2494        | <i>panD</i> | aspartate 1-decarboxylase precursor                                                                | -2.13 |
| NWMN_2495        | <i>panC</i> | pantoate--beta-alanine ligase                                                                      | -1.85 |
| NWMN_2498        |             | similar to alpha-acetolactate decarboxylase                                                        | -2.08 |
| NWMN_2540        |             | fructose phosphotransferase system enzyme fruA homolog                                             | -9.04 |
| NWMN_2541        | <i>manA</i> | mannose-6-phosphate isomerase, class I                                                             | -6.31 |
| NWMN_2571        | <i>hisF</i> | imidazole glycerol phosphate synthase subunit hisF                                                 | -1.92 |
| NWMN_2572        |             | 1-(5-phosphoribosyl)-5-[(5-phosphoribosylamino) methylideneamino imidazole-4-carboxamide isomerase | -1.81 |
| NWMN_2592        |             | 2-oxoglutarate/malate translocator                                                                 | -1.81 |
| <b>Transport</b> |             |                                                                                                    |       |
| NWMN_0048        |             | putative transporter protein                                                                       | 4.09  |

|           |             |                                                                       |       |
|-----------|-------------|-----------------------------------------------------------------------|-------|
| NWMN_0054 | <i>lctP</i> | L-lactate permease                                                    | 3.05  |
| NWMN_0057 | <i>sirC</i> | iron compound ABC transporter, permease protein SirC                  | 2.01  |
| NWMN_0158 | <i>uhpT</i> | sugar phosphate antiporter                                            | 2.00  |
| NWMN_0536 | <i>proP</i> | proline/betaine transporter homolog                                   | 3.28  |
| NWMN_0593 |             | putative monovalent cation/H <sup>+</sup> antiporter subunit A        | 2.72  |
| NWMN_0614 |             | putative nucleoside transporter                                       | 1.84  |
| NWMN_0688 |             | similar to ABC transporter ATP-binding protein                        | 2.53  |
| NWMN_1207 | <i>glpF</i> | glycerol uptake facilitator                                           | 2.21  |
| NWMN_1292 |             | putative oligopeptide transport system permease                       | 1.81  |
| NWMN_1347 |             | amino acid permease                                                   | 2.04  |
| NWMN_1854 |             | similar to sodium-dependent transporter                               | 2.00  |
| NWMN_2351 |             | putative transport protein                                            | 2.16  |
| NWMN_2353 |             | ABC transporter, ATP-binding protein                                  | 2.12  |
| NWMN_1717 |             | lantibiotic precursor                                                 | 1.82  |
| NWMN_0481 |             | pyridoxine biosynthesis protein                                       | 4.64  |
| NWMN_0527 |             | similar to poly (glycerol-phosphate) alpha-glucosyltransferase        | 1.91  |
| NWMN_0554 | <i>mvaD</i> | mevalonate diphosphate decarboxylase                                  | 2.76  |
| NWMN_1089 |             | S-adenosyl-methyltransferase mraW                                     | 2.40  |
| NWMN_0827 | <i>rocD</i> | ornithine--oxo-acid transaminase                                      | 2.01  |
| NWMN_1155 | <i>sucC</i> | succinyl-CoA synthetase subunit beta                                  | 2.30  |
| NWMN_1192 | <i>pgsA</i> | CDP-diacylglycerol--glycerol-3-phosphate<br>3-phosphatidyltransferase | 2.68  |
| NWMN_1254 | <i>tkt</i>  | transketolase                                                         | 1.79  |
| NWMN_1331 |             | acetyltransferase, GNAT family                                        | 2.33  |
| NWMN_1378 | <i>ndk</i>  | nucleoside diphosphate kinase                                         | 2.09  |
| NWMN_1474 | <i>phoH</i> | phosphate starvation-induced protein, PhoH family                     | 2.30  |
| NWMN_1441 | <i>gcvT</i> | aminomethyltransferase (glycine cleavage system T protein)            | 3.06  |
| NWMN_1470 | <i>era</i>  | GTP-binding protein Era                                               | 2.25  |
| NWMN_1471 | <i>cdd</i>  | cytidine deaminase                                                    | 2.04  |
| NWMN_1472 |             | putative diacylglycerol kinase                                        | 2.62  |
| NWMN_1681 | <i>pckA</i> | phosphoenolpyruvate carboxykinase                                     | 1.90  |
| NWMN_1743 | <i>citG</i> | fumarate hydratase, class-II                                          | 2.44  |
| NWMN_2056 | <i>glmS</i> | D-fructose-6-phosphate amidotransferase                               | 2.02  |
| NWMN_2429 |             | putative L-serine dehydratase                                         | 3.59  |
| NWMN_2430 |             | putative beta-subunit of L-serine dehydratase                         | 3.58  |
| NWMN_2431 |             | perfringolysin O regulator protein                                    | 3.74  |
| NWMN_0133 |             | glucose-specific PTS transporter protein, IIABC component             | -2.05 |
| NWMN_0153 |             | putative sugar transport system permease                              | -2.01 |
| NWMN_0154 |             | maltose/maltodextrin transport permease homolog                       | -2.94 |
| NWMN_0251 |             | similar to ABC transporter (ATP-binding protein)                      | -1.88 |
| NWMN_0177 |             | PTS system, IIIC components                                           | -2.08 |
| NWMN_0322 | <i>ulaA</i> | ascorbate-specific PTS system enzyme IIC                              | -4.34 |
| NWMN_0323 |             | putative sugar-specific PTS component EIIB                            | -3.79 |
| NWMN_0374 |             | putative sodium:dicarboxylate symporter protein                       | -1.99 |



|                         |                         |                                                                              |       |
|-------------------------|-------------------------|------------------------------------------------------------------------------|-------|
| NWMN_0669               |                         | PTS transport system, fructose-specific IIBC component                       | -1.87 |
| NWMN_0702               |                         | FecCD transport family protein                                               | -2.95 |
| NWMN_0782               |                         | similar to ABC transporter substrate-binding protein                         | -1.92 |
| NWMN_0813               |                         | Na <sup>+</sup> /H <sup>+</sup> antiporter family protein                    | -2.38 |
| NWMN_0965               | <i>potA</i>             | spermidine/putrescine ABC transporter                                        | -1.92 |
| NWMN_1269               |                         | sodium:alanine symporter family protein                                      | -2.16 |
| NWMN_1290               |                         | oligopeptide transporter putative ATPase domain                              | -1.82 |
| NWMN_2177               | <i>modC</i>             | molybdenum transport ATP-binding protein                                     | -2.01 |
| NWMN_2253               |                         | putative transport protein                                                   | -2.54 |
| NWMN_2279               |                         | PTS system, sucrose-specific IIBC component                                  | -1.82 |
| NWMN_2298               |                         | tetrapyrrole (corrin/porphyrin) methylase family protein                     | -2.57 |
| NWMN_2344               |                         | putative glycine betaine/carnitine/choline transport system permease protein | -4.38 |
| NWMN_2345               | <i>opuC</i><br><i>C</i> | glycine betaine/carnitine/choline ABC transporter                            | -3.26 |
| NWMN_2346               | <i>opuC</i><br><i>B</i> | putative glycine betaine/carnitine/choline transport system permease protein | -3.14 |
| NWMN_2347               | <i>opuC</i><br><i>A</i> | glycine betaine/carnitine/choline ABC transporter                            | -2.58 |
| NWMN_2401               |                         | putative gluconate permease                                                  | -3.14 |
| NWMN_2595               | <i>nixA</i>             | high-affinity nickel-transporter                                             | -1.89 |
| <b>Unknown function</b> |                         |                                                                              |       |
| NWMN_0053               |                         | hypothetical protein                                                         | 2.90  |
| NWMN_0135               |                         | hypothetical protein                                                         | 2.43  |
| NWMN_0377               |                         | hypothetical protein                                                         | 3.58  |
| NWMN_0402               |                         | hypothetical protein                                                         | 2.74  |
| NWMN_0413               |                         | hypothetical protein                                                         | 2.29  |
| NWMN_0414               |                         | hypothetical protein                                                         | 3.04  |
| NWMN_0415               |                         | hypothetical protein                                                         | 2.51  |
| NWMN_0450               |                         | hypothetical protein                                                         | 1.91  |
| NWMN_0457               |                         | veg protein                                                                  | 2.21  |
| NWMN_0482               |                         | hypothetical protein                                                         | 5.94  |
| NWMN_0542               |                         | hypothetical protein                                                         | 3.00  |
| NWMN_0561               |                         | hypothetical protein                                                         | 2.41  |
| NWMN_0592               |                         | phage integrase family protein                                               | 4.79  |
| NWMN_0622               |                         | hypothetical protein                                                         | 1.77  |
| NWMN_0687               |                         | sulfatase family protein                                                     | 2.89  |
| NWMN_0710               |                         | hypothetical protein                                                         | 2.41  |
| NWMN_0765               |                         | hypothetical protein                                                         | 2.57  |
| NWMN_0766               |                         | hypothetical protein                                                         | 5.82  |
| NWMN_0767               |                         | hypothetical protein                                                         | 7.03  |
| NWMN_0778               |                         | Toprim domain protein                                                        | 2.80  |
| NWMN_0783               |                         | CsbD-like superfamily                                                        | 5.97  |

|                    |                                    |      |
|--------------------|------------------------------------|------|
| NWMN_0825          | hypothetical protein               | 2.57 |
| NWMN_0885          | hypothetical protein               | 2.09 |
| NWMN_0912          | hypothetical protein               | 1.99 |
| NWMN_0948          | hypothetical protein               | 4.44 |
| NWMN_0956          | hypothetical protein               | 1.88 |
| NWMN_0983          | hypothetical protein               | 1.86 |
| NWMN_0983          | hypothetical protein               | 2.09 |
| NWMN_0984          | hypothetical protein               | 1.99 |
| NWMN_0995          | similar to anti-repressor          | 2.04 |
| NWMN_1017-<br>1018 | hypothetical protein               | 1.89 |
| NWMN_1068          | hypothetical protein               | 2.54 |
| NWMN_1076          | hypothetical protein               | 1.93 |
| NWMN_1088          | <i>mraZ</i> hypothetical protein   | 1.91 |
| NWMN_1100          | hypothetical protein               | 1.86 |
| NWMN_1190          | hypothetical protein               | 2.25 |
| NWMN_1191          | hypothetical protein               | 2.28 |
| NWMN_1238          | hypothetical protein               | 2.97 |
| NWMN_1263          | hypothetical protein               | 2.45 |
| NWMN_1360          | hypothetical protein               | 1.99 |
| NWMN_1397          | hypothetical protein               | 2.01 |
| NWMN_1473          | hypothetical protein               | 2.24 |
| NWMN_1504          | hypothetical protein               | 3.13 |
| NWMN_1526          | hypothetical protein               | 2.57 |
| NWMN_1527          | hypothetical protein               | 3.79 |
| NWMN_1552          | hypothetical protein               | 2.06 |
| NWMN_1627          | acetoin utilization protein        | 2.15 |
| NWMN_1631          | hypothetical protein               | 2.49 |
| NWMN_1631          | hypothetical protein               | 2.56 |
| NWMN_1632          | hypothetical protein               | 2.27 |
| NWMN_1640          | hypothetical protein               | 1.87 |
| NWMN_1645          | hypothetical protein               | 2.23 |
| NWMN_1709          | truncated hypothetical protein     | 2.66 |
| NWMN_1730          | hypothetical protein               | 2.46 |
| NWMN_1745          | hypothetical protein               | 1.95 |
| NWMN_1746          | hypothetical protein               | 2.38 |
| NWMN_1767          | hypothetical protein               | 2.95 |
| NWMN_1821          | hypothetical protein               | 4.56 |
| NWMN_1914          | hypothetical protein               | 3.04 |
| NWMN_1916          | hypothetical protein               | 1.81 |
| NWMN_1934          | hypothetical protein               | 2.17 |
| NWMN_2005          | hypothetical protein               | 1.86 |
| NWMN_2061          | <i>fmtB</i> truncated FmtB protein | 2.18 |
| NWMN_2079          | hypothetical protein               | 1.93 |

|           |             |                                   |       |
|-----------|-------------|-----------------------------------|-------|
| NWMN_2087 |             | hypothetical protein              | 4.59  |
| NWMN_2088 |             | hypothetical protein              | 2.29  |
| NWMN_2209 |             | hypothetical protein              | 2.62  |
| NWMN_2352 |             | hypothetical protein              | 2.29  |
| NWMN_2368 |             | hypothetical protein              | 3.41  |
| NWMN_2506 |             | putative AMP-binding enzyme       | 1.99  |
| NWMN_2606 |             | hypothetical protein              | 2.53  |
| NWMN_2607 |             | hypothetical protein              | 2.13  |
| NWMN_0032 |             | hypothetical protein              | -2.18 |
| NWMN_0051 |             | integral membrane domain protein  | -2.95 |
| NWMN_0157 |             | hypothetical protein              | -2.36 |
| NWMN_0165 |             | hypothetical protein              | -2.15 |
| NWMN_0219 |             | hypothetical protein              | -2.49 |
| NWMN_0252 |             | regulatory protein PfoR           | -1.89 |
| NWMN_0261 |             | hypothetical protein              | -3.15 |
| NWMN_0324 |             | hypothetical protein              | -4.68 |
| NWMN_0344 |             | hypothetical protein              | -2.12 |
| NWMN_0386 |             | hypothetical protein              | -2.23 |
| NWMN_0416 |             | hypothetical protein              | -3.95 |
| NWMN_0419 |             | hypothetical protein              | -2.91 |
| NWMN_0503 |             | hypothetical protein              | -2.60 |
| NWMN_0566 |             | hypothetical protein              | -1.91 |
| NWMN_0739 |             | hypothetical protein              | -1.98 |
| NWMN_0759 |             | hypothetical protein              | -5.33 |
| NWMN_0820 | <i>mmhC</i> | hypothetical protein              | -2.22 |
| NWMN_0896 |             | hypothetical protein              | -3.63 |
| NWMN_0900 |             | hypothetical protein              | -2.47 |
| NWMN_1072 |             | hypothetical protein              | -2.20 |
| NWMN_1624 |             | hypothetical protein              | -3.36 |
| NWMN_1828 |             | hypothetical protein              | -2.22 |
| NWMN_1861 |             | hypothetical protein              | -2.51 |
| NWMN_1903 |             | phi77 ORF031-like protein         | -2.59 |
| NWMN_1908 |             | phiPVL ORF046-like protein        | -2.44 |
| NWMN_2039 |             | hypothetical protein              | -2.92 |
| NWMN_2254 |             | hypothetical protein              | -1.80 |
| NWMN_2265 |             | hypothetical protein              | -2.87 |
| NWMN_2266 |             | hypothetical protein              | -2.14 |
| NWMN_2282 |             | similar to general stress protein | -2.60 |
| NWMN_2307 |             | hypothetical protein              | -2.09 |
| NWMN_2432 |             | hypothetical protein              | -1.99 |
| NWMN_2487 |             | hypothetical protein              | -2.26 |
| NWMN_2489 |             | hypothetical protein              | -2.02 |
| NWMN_2597 |             | hypothetical protein              | -2.81 |

## REFERENCES

- (1) Kreiswirth, B. N.; Lofdahl, S.; Betley, M. J.; O'Reilly, M.; Schlievert, P. M.; Bergdoll, M. S.; Novick, R. P. *Nature* **1983**, *305*, 709.
- (2) Duthie, E. S.; Lorenz, L. L. *J Gen Microbiol* **1952**, *6*, 95.
- (3) Bae, T.; Banger, A. K.; Wallace, A.; Glass, E. M.; Aslund, F.; Schneewind, O.; Missiakas, D. M. *Proc Natl Acad Sci U S A* **2004**, *101*, 12312.
- (4) Lee, C. Y.; Buranen, S. L.; Ye, Z. H. *Gene* **1991**, *103*, 101.
- (5) Ji, Y.; Marra, A.; Rosenberg, M.; Woodnutt, G. *J Bacteriol* **1999**, *181*, 6585.
- (6) Sun, J.; Zheng, L.; Landwehr, C.; Yang, J.; Ji, Y. *J Bacteriol* **2005**, *187*, 7876.
- (7) Donnelly, M. I.; Zhou, M.; Millard, C. S.; Clancy, S.; Stols, L.; Eschenfeldt, W. H.; Collart, F. R.; Joachimiak, A. *Protein Expr Purif* **2006**, *47*, 446.
